# Supplementary material for: Temporal and Spatial Analysis Techniques as Potential Tools for Combating the HIV Epidemic among Young Brazilian Amazonian People: An Ecological Study
Source: MDPI journal article supplement (doi:10.3390/tropicalmed7070137), 2022-07-16
Supplement: s1 [file s1]

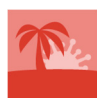

Article

# Temporal and Spatial Analysis Techniques as Potential Tools for Combating the HIV Epidemic among Young Brazilian Amazonian People: An Ecological Study

Andrey Oeiras Pedroso <sup>1</sup>, Dulce Gomes <sup>2</sup>, Sara Melissa Lago Sousa <sup>1</sup>, Glenda Roberta Oliveira Naiff Ferreira <sup>1</sup>, Aline Maria Pereira Cruz Ramos <sup>1</sup>, Sandra Helena Isse Polaro <sup>1</sup>, Laura Maria Vidal Nogueira <sup>3</sup> and Eliã Pinheiro Botelho <sup>1,\*</sup>

<sup>1</sup> Programa de Pós-Graduação em Enfermagem, Federal University of Pará, Belém 66075-110, Brazil; andrey.pedroso@ics.ufpa.br (A.O.P.); sara.sousa@ics.ufpa.br (S.M.L.S.); glendaf@ufpa.br (G.R.O.N.F.); nurse.alinecruz@gmail.com (A.M.P.C.R.); shpolaro@ufpa.br (S.H.I.P.)

<sup>2</sup> Departamento de Matemática, Colégio Luís António Verney, University of Évora, 7000-671 Évora, Portugal; dmog@uevora.pt

<sup>3</sup> Departamento de Enfermagem Comunitária, State University of Pará, Belém 66050-540, Brazil; lauramavidal@gmail.com

\* Correspondence: ebotelho@ufpa.br

**Table S1.** ariables used in Geographically Weighted Regression.

| Variable         |                                                                                                                                                                   |
|------------------|-------------------------------------------------------------------------------------------------------------------------------------------------------------------|
| Education        |                                                                                                                                                                   |
| v1               | Failure rate in elementary school in the municipalities - 2018                                                                                                    |
| v2               | Failure rate in high school in the municipalities - 2018                                                                                                          |
| v3               | Dropout Rate in Elementary School in the municipalities - 2018                                                                                                    |
| v4               | Dropout Rate in High School in the municipalities - 2018                                                                                                          |
| v5               | Basic education development index - IDEB - Public school - for the first five years of school in the municipalities – 2017                                        |
| v6               | Basic education development index - IDEB - Public school - for the 9 years of school in the municipalities – 2017                                                 |
| Social inclusion |                                                                                                                                                                   |
| v7               | Number of Families Assisted in the Bolsa Família Program in the municipalities– 2018                                                                              |
| v8               | Total families enrolled in the Single Register for Social Programs (CadÚnico) in the municipalities - 2018                                                        |
| v9               | Total families enrolled in the Single Register for Social Programs (CadÚnico) with per capita family income of up to 1/2 minimum wage in the municipalities- 2018 |
| Labor Market     |                                                                                                                                                                   |
| v10              | Total Employment in Formal Employment in the municipalities – 2018                                                                                                |
| v11              | Average Remuneration (R\$) of Formal Worker in the municipalities – 2018                                                                                          |
| Health           |                                                                                                                                                                   |
| v12              | Municipal Family Health Strategy services coverage – 2018                                                                                                         |
| v13              | Municipal Basic Healthcare unities coverage - 2018                                                                                                                |
| v14              | Municipal Healthcare places coverage per 10,000 inhabitants - 2018                                                                                                |
| v15              | Physicians per 10,000 inhabitants - 2018                                                                                                                          |
| v16              | Municipal hospital bed coverage per 1,000 inhabitants - 2018                                                                                                      |
| Safety           |                                                                                                                                                                   |
| v17              | Youth homicide rate per 100,000 inhabitants – 2018                                                                                                                |

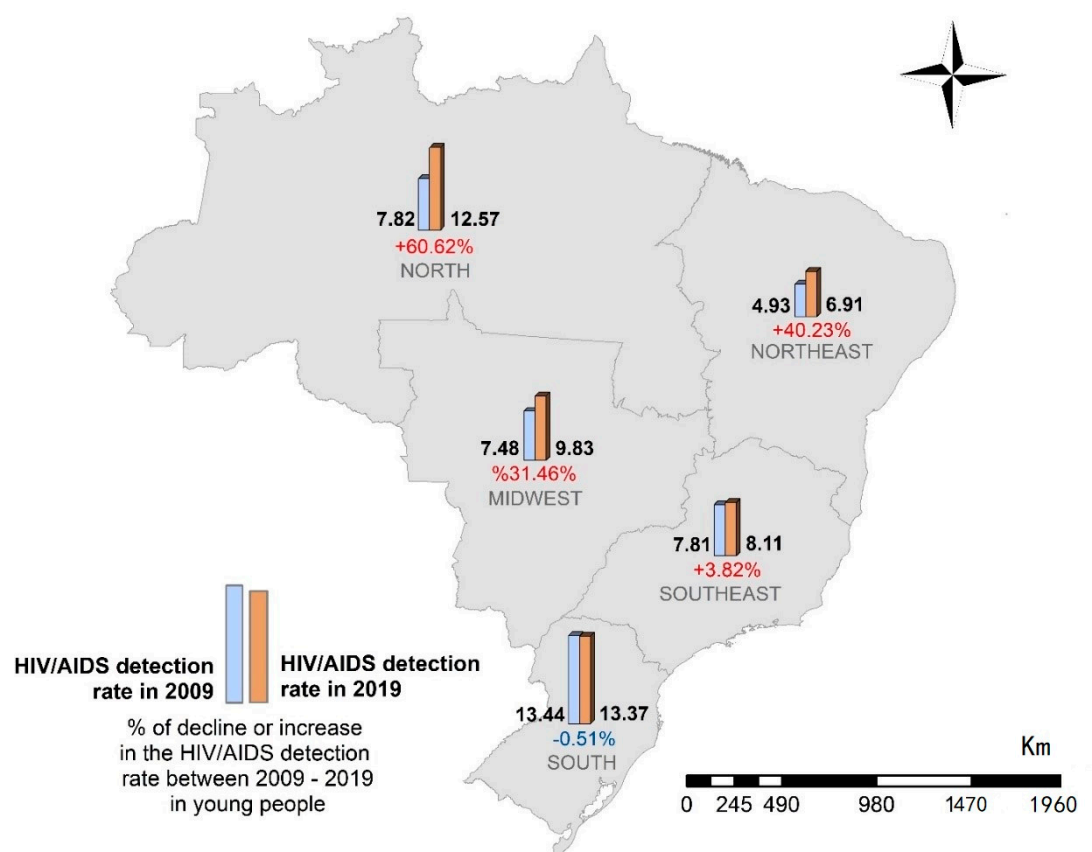

**Figure S1.** HIV/AIDS detection rate between 2009 and 2019 among young people in Brazil, 2009–2019.
